# Supplementary material for: Seasonal Snow-Atmosphere Modeling: Let's do it
Source: Copernicus journal article supplement (doi:10.5194/egusphere-2024-489), 2024-03-27
Supplement: Supplementary file 1 [file egusphere-2024-489-supplement.pdf]

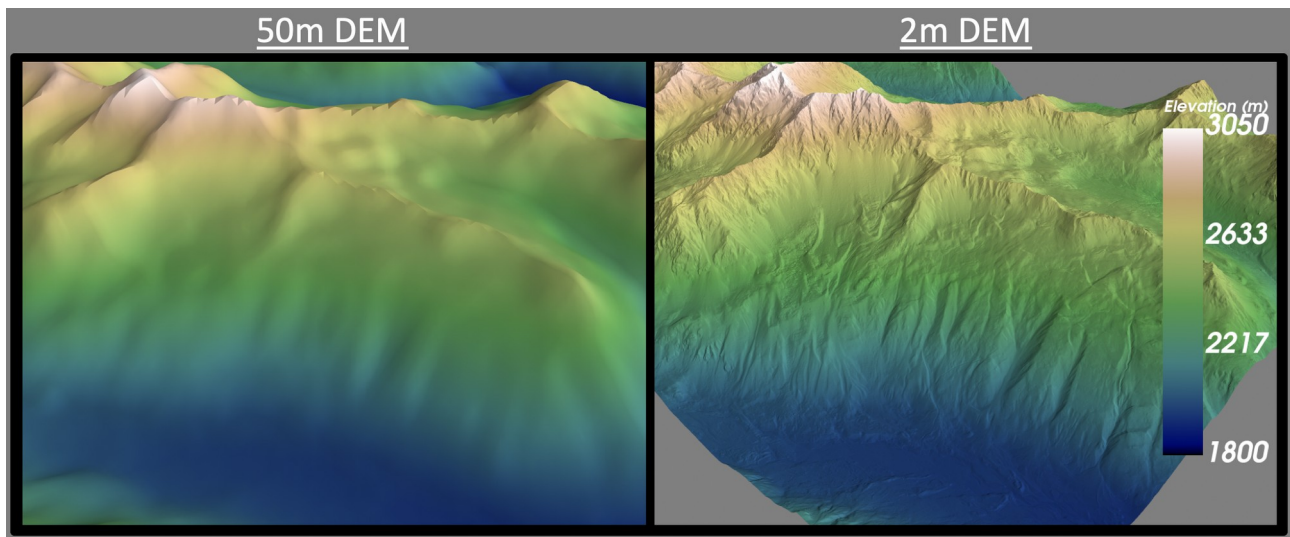

Fig S1: Part of the model domain represented using either a 50m or 2m DEM. The view of the camera is indicated in figure 1 by the purple angle.
