# Supplementary material for: Seasonal Snow-Atmosphere Modeling: Let's do it
Source: Copernicus journal article supplement (doi:10.5194/egusphere-2024-489), 2024-03-27
Supplement: Supplementary file [file egusphere-2024-489-AC2-supplement.pdf]

## Reviewer Comment 2

Regarding the general comments, the research questions have been better motivated and laid out. This was done by adding to the introduction a discussion of prior work with the ISHMAEL scheme at coarser spatial resolutions, as well as the hypothesis that better resolving hydrometeor properties which influence fall speed should result in altered deposition patterns relative to two-moment schemes. Some questions are now explicitly given starting on L97.

The in-prep manuscripts which the current modeling strategy is based upon are all open-source, so we do not see that these decisions are “behind” or unavailable to readers at the present time. Some discussion of modeling resolutions necessary for capturing snow depth heterogeneities relevant for snow hydrology is also given starting at L66. That said, we do take the reviewers advice to expand upon the spatial resolutions used in this study, and offer a comment on the topic at L184 when discussing the model setup.

Canopy-wind interactions are indeed an interesting challenge for the model. Aside from the calculation of surface wind speed needed for the land surface model and snow model, the wind field is unaware of surface roughness elements. This could be better included in the future via a parameterization which dampens wind speed over these regions, similar to what was proposed in Reynolds et al., 2023 for regions with negative TPI.

L20 Exposed to what?

Removed

L21 is it really a discontinuity though? The derivative remains well defined. I think this would be better restated as "sharp gradient" or similar

Accepted

L23 "modified" w/c. Modified feels like a model input term

Changed to “altered”

L34 space between amount and unit – 100m -> 100 m. Fix throughout

Changed throughout

L34 "at elevations" - "at a height above the surface of" might be more clear to match the language on L41

Accepted

L57 "modern" -> contemporary?

Removed

L58 "troubling" w/c

Removed

L65 "These conditions have been followed by the earlier studies" what conditions are these and how can they be followed by an earlier study?

Changed

L66 " This is due to" unclear what this is in reference to

Changed

L67 horizontal and vertical resolutions?

Changed

L67 "One exception to this " what is this?

Changed

L67+ There is a lot of "this" throughout the section, which makes it difficult to follow. Generally I can infer what "this" is in reference to, but it would be best to explicitly state it to ease readability.

Noted, changed

L72 "Caveat aside" which caveat is this in reference to?

Changed

L74 "adopting this strategy" this == intermediate complexity atmospheric models?

Changed

L85 what are the scientific questions, specifically?

Added explicit questions at L97

L90 Later in the MS I found the mix of FSM2trans (e.g. fig 11), HICARsnow, NoahMP, a bit confusing. L 103 notes the name depends on the coupling strategy. I think a small table or a very clear description of all the comparisons would help readability

More clearly described on L199.

L93 define `oshd` ?

Removed

L96 static lib, are you meaning a `a` ? This is very specific — do you mean this to preclude using a dynamic lib?

Yes, a static library was used with the thinking that this should have less computational overhead than a dynamically linked library.

L109 FSM2 has a soil routine. How are frozen soils + the ground heatflux coupled into this? Or is this fully disabled in this configuration

The soil routine for FSM2 is used for grid cells which are snow covered. Frozen soil and the ground heat flux into the snowpack are considered by FSM2, as described in Essery et al., 2015. Still, the soil model in FSM2, and the corresponding interplay with NoahMP, is a part of HICARsnow ripe for future improvements.

L128 Is there an opportunity to use a dynamic iteration based on an error term versus a fixed iteration count ?

Great question, we wondered this too. In our envisaged implementation, this would require a global reduction of the error term. If one process had reached steady-state fluxes, but an upwind processes had not yet, there may be a need for the current process to re-calculate its fluxes using these neighboring flux values at a future iteration. The inter-process communication required to achieve this likely cancels out the reduction in computations. And, the fixed iteration count chosen has proven to be robust across the seasonal period used here. We considered dynamic iterations to thus be code optimization, and not necessary at this point in the model development.

L125 “image” is not clear. I have a vague recollection this is maybe a iSNOBAL term? For the raster? Can you please clarify.

This is a term from coarrays fortran programming, but has been replaced with “processing element” for more general clarity.

L170 fix TODO: HERE

Removed

L171 can you list, even briefly the details? Difficult to tell with an in-prep manuscript (but I do understand)

[Linked to the now published study](#)

L235 Maybe it is just the layout, but it seems that the text goes from citing Fig 2 to Fig 6&7. My recommendation would be number the figures in the order they appear. As is, I’m finding it difficult to find the text that references a specific figure

Figures are numbered in the order they appear – latex references have been used for figure numbers. Agreed that there is a lot of jumping between figures throughout the section though – hopefully typesetting of the final article resolves this.

L 275 Figure 7: What are the purple contours in the 2nd row? I don’t see them in the legend. I like this plot though.

There are no purple contours in this plot, but the colored contours in the second row are described in the figure caption.

L331 How is the surface roughness interaction with HICAR modelled?

Surface friction velocity is calculated assuming a log-law transform of wind speeds from the lowest HICAR level and using the surface roughness calculated by the land surface/snow model.

L359 “The following paragraph” — suggest you start a new paragraph

Accepted

L361 how big is “slight”?

Added exact values

L414 Do you think this excessive cooling impact ablation rates? I had originally read this as a FSM2 characteristic, but rereading the text I’m uncertain if it is actually NOAHMP.

Please tighten this up a bit

Added a direct reference to NoahMP in this sentence to make it clearer.

L443 these tradeoffs should be clearly noted in the methodology

The caveats of these intermediate modeling approaches have been detailed in prior studies (Reynolds et al., 2023, 2024) and (Liston and Elder 2007, Quéno et al., 2024) and are discussed throughout the manuscript. Still, we mention the two largest shortcomings of their modeling approaches (i.e. turbulent eddies, blowing snow transport) on L460 now.

Citations not in manuscript:

Essery, R.: A factorial snowpack model (FSM 1.0), *Geosci. Model Dev.*, 8, 3867–3876, <https://doi.org/10.5194/gmd-8-3867-2015>, 2015.
